# Supplementary material for: Transgenerationally Transmitted DNA Demethylation of a Spontaneous Epialleles Using CRISPR/dCas9-TET1cd Targeted Epigenetic Editing in Arabidopsis
Source: MDPI journal article supplement (doi:10.3390/ijms231810492), 2022-09-10
Supplement: s1 [file s1]

|        |      |                                                           |      |
|--------|------|-----------------------------------------------------------|------|
| Bor 4  | 1    | GTTTTTTTTTTTTTTTAACTACTACTACAAGTTTATTAGATTGTATAAGGTTGAT   | 57   |
| Lp2-2  | 1    | GTTTTTTTTTTTTTTTAACTACTACTACAAGTTTATTAGATTGTATAAGGTTGAT   | 57   |
| Bs 1   | 1    | GTTTTTTTTTTTTTTTAACTACTACTACAAGTTTATTAGATTGTATAAGGTTGAT   | 57   |
| Kort 0 | 1    | GTTTTTTTTTTTTTTTAACTACTACTACAAGTTTATTAGATTGTATAAGGTTGAT   | 57   |
| Bor 4  | 58   | ACAAATAAGAGAGTAAGAAACGAGGAAGAACAATAAAGGACTGATACAGAGTAGTAG | 114  |
| Lp2-2  | 58   | ACAAATAAGAGAGTAAGAAACGAGGAAGAACAATAAAGGACTGATACAGAGTAGTAG | 114  |
| Bs 1   | 58   | ACAAATAAGAGAGTAAGAAACGAGGAAGAACAATAAAGGACTGATACAGAGTAGTAG | 114  |
| Kort 0 | 58   | ACAAATAAGAGAGTAAGAAACGAGGAAGAACAATAAAGGACTGATACAGAGTAGTAG | 114  |
| Bor 4  | 115  | TAGACAAAACATATTGAGCCATCTTATCTGCAGCAC                      | 171  |
| Lp2-2  | 115  | TAGACAAAACATATTGAGCCATCTTATCTGCAGCAC                      | 171  |
| Bs 1   | 115  | TAGACAAAACATATTGAGCCATCTTATCTGCAGCAC                      | 171  |
| Kort 0 | 115  | TAGACAAAACATATTGAGCCATCTTATCTGCAGCAC                      | 171  |
| Bor 4  | 172  | CGAGAAGAGTGACGTTGGATAGTTTTGCCATCCAATGACGAATATCGAACAGGAGAG | 228  |
| Lp2-2  | 172  | CGAGAAGAGTGACGTTGGATAGTTTTGCCATCCAATGACGAATATCGAACAGGAGAG | 228  |
| Bs 1   | 172  | CGAGAAGAGTGACGTTGGATAGTTTTGCCATCCAATGACGAATATCGAACAGGAGAG | 228  |
| Kort 0 | 172  | CGAGAAGAGTGACGTTGGATAGTTTTGCCATCCAATGACGAATATCGAACAGGAGAG | 228  |
| Bor 4  | 1369 | CTAAACGAACTCGTAATCCTTGACAAAGTAACTCTTTT                    | 1425 |
| Lp2-2  | 1369 | CTAAACGAACTCGTAATCCTTGACAAAGTAACTCTTTT                    | 1425 |
| Bs 1   | 1369 | CTAAACGAACTCGTAATCCTTGACAAAGTAACTCTTTT                    | 1425 |
| Kort 0 | 1369 | CTAAACGAACTCGTAATCCTTGACAAAGTAACTCTTTT                    | 1425 |
| Bor 4  | 1426 | ATCCAAAAGATGTATAGGTTCTGTCAACGCTTCCAAATAAGAGGTTTGAGGATGAT  | 1482 |
| Lp2-2  | 1426 | ATCCAAAAGATGTATAGGTTCTGTCAACGCTTCCAAATAAGAGGTTTGAGGATGAT  | 1482 |
| Bs 1   | 1426 | ATCCAAAAGATGTATAGGTTCTGTCAACGCTTCCAAATAAGAGGTTTGAGGATGAT  | 1482 |
| Kort 0 | 1426 | ATCCAAAAGATGTATAGGTTCTGTCAACGCTTCCAAATAAGAGGTTTGAGGATGAT  | 1482 |
| Bor 4  | 1483 | ACATACCTTTATAAAGACGGGCCAAAAGACTCTGAGGATTTCTCAAAATTCTCCAAG | 1539 |
| Lp2-2  | 1483 | ACATACCTTTATAAAGACGGGCCAAAAGACTCTGAGGATTTCTCAAAATTCTCCAAG | 1539 |
| Bs 1   | 1483 | ACATACCTTTATAAAGACGGGCCAAAAGACTCTGAGGATTTCTCAAAATTCTCCAAG | 1539 |
| Kort 0 | 1483 | ACATACCTTTATAAAGACGGGCCAAAAGACTCTGAGGATTTCTCAAAATTCTCCAAG | 1539 |
| Bor 4  | 2395 | CTACCCGATCATAGGCCTTGCTTATATCAGTTTTAATCGCCAAATACCCATTCTGGC | 2451 |
| Lp2-2  | 2395 | CTACCCGATCATAGGCCTTGCTTATATCAGTTTTAATCGCCAAATACCCATTCTGGC | 2451 |
| Bs 1   | 2395 | CTACCCGATCATAGGCCTTGCTTATATCAGTTTTAATCGCCAAATACCCATTCTGGC | 2451 |
| Kort 0 | 2395 | CTACCCGATCATAGGCCTTGCTTATATCAGTTTTAATCGCCAAATACCCATTCTGGC | 2451 |
| Bor 4  | 2452 | ACTCCCTCTTCGACTTGAGTGAATGTAGAAGTTTCATGAGCCACTAGTACAT      | 2508 |
| Lp2-2  | 2452 | ACTCCCTCTTCGACTTGAGTGAATGTAGAAGTTTCATGAGCCACTAGTACAT      | 2508 |
| Bs 1   | 2452 | ACTCCCTCTTCGACTTGAGTGAATGTAGAAGTTTCATGAGCCACTAGTACAT      | 2508 |
| Kort 0 | 2452 | ACTCCCTCTTCGACTTGAGTGAATGTAGAAGTTTCATGAGCCACTAGTACAT      | 2508 |
| Bor 4  | 2509 | ATATATTACGACCA                                            | 2565 |
| Lp2-2  | 2509 | ATATATTACGACCA                                            | 2565 |
| Bs 1   | 2509 | ATATATTACGACCA                                            | 2565 |
| Kort 0 | 2509 | ATATATTACGACCA                                            | 2565 |
| Bor 4  | 2566 | AATCTGAGA                                                 | 2574 |
| Lp2-2  | 2566 | AATCTGAGA                                                 | 2574 |
| Bs 1   | 2566 | AATCTGAGA                                                 | 2574 |
| Kort 0 | 2566 | AATCTGAGA                                                 | 2574 |

**Figure S1 Result of NMR19-4 sequence alignment and information of sgRNA sequence, position and PAM sequence in Bor 4, Lp2-2, Bs 1 and Krot 0. Yellow represents sgRNA and pink represents PAM sequence.**
