# Supplementary material for: Transgenerationally Transmitted DNA Demethylation of a Spontaneous Epialleles Using CRISPR/dCas9-TET1cd Targeted Epigenetic Editing in Arabidopsis
Source: MDPI journal article supplement (doi:10.3390/ijms231810492), 2022-09-10
Supplement: s1 [file s1]

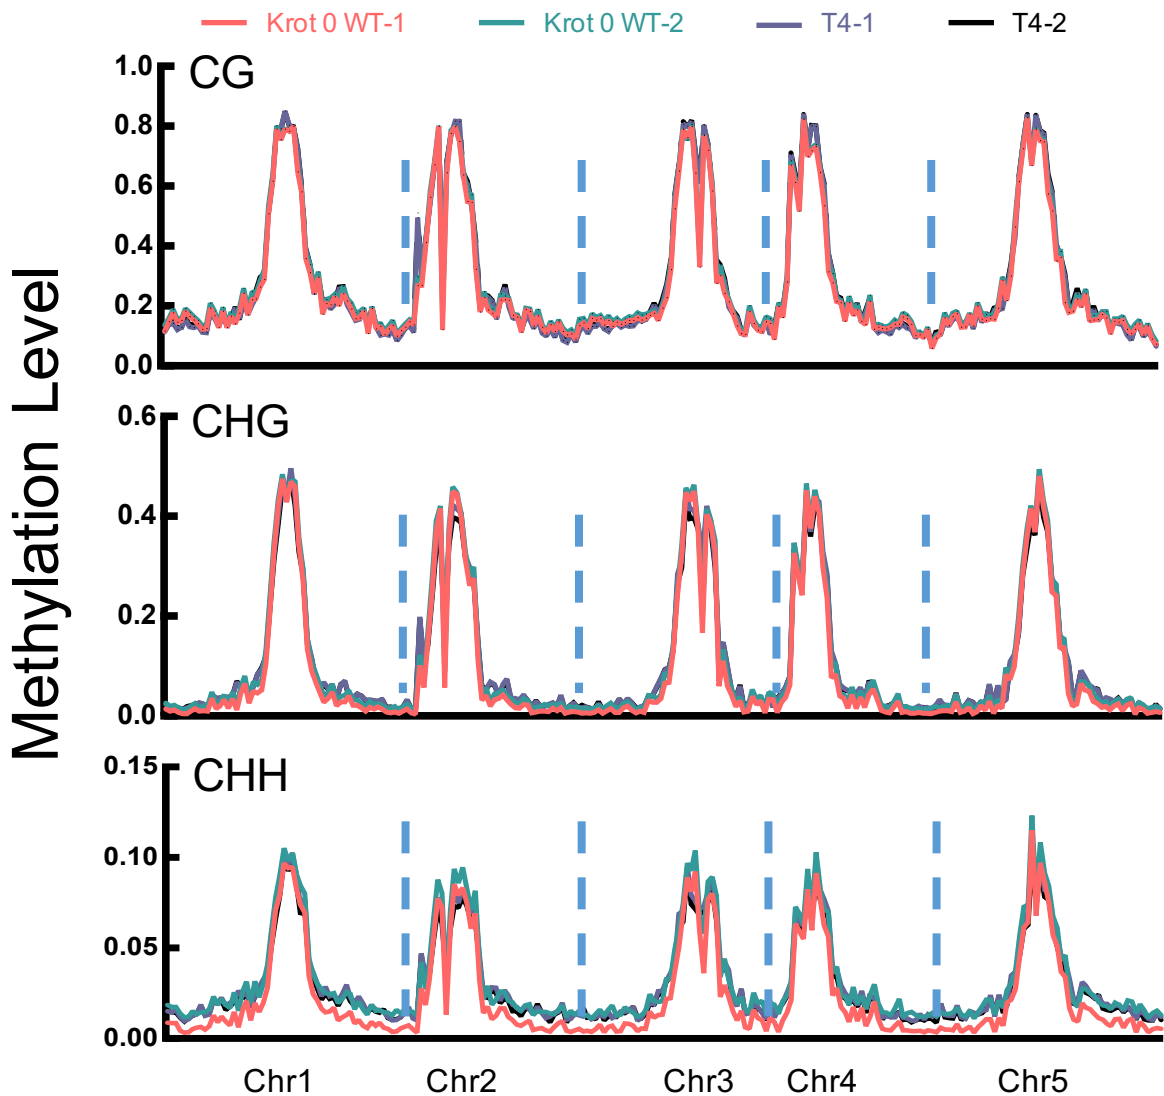

**Figure S2 NMR19-4 related CRISPR/dCas9-TET1cd does not affect the genome methylation levels. Genome methylation of CG, CHG and CHH in two independent Krot 0 WT and T4.**
