# Supplementary material for: Transgenerationally Transmitted DNA Demethylation of a Spontaneous Epialleles Using CRISPR/dCas9-TET1cd Targeted Epigenetic Editing in Arabidopsis
Source: MDPI journal article supplement (doi:10.3390/ijms231810492), 2022-09-10
Supplement: s1 [file s1]

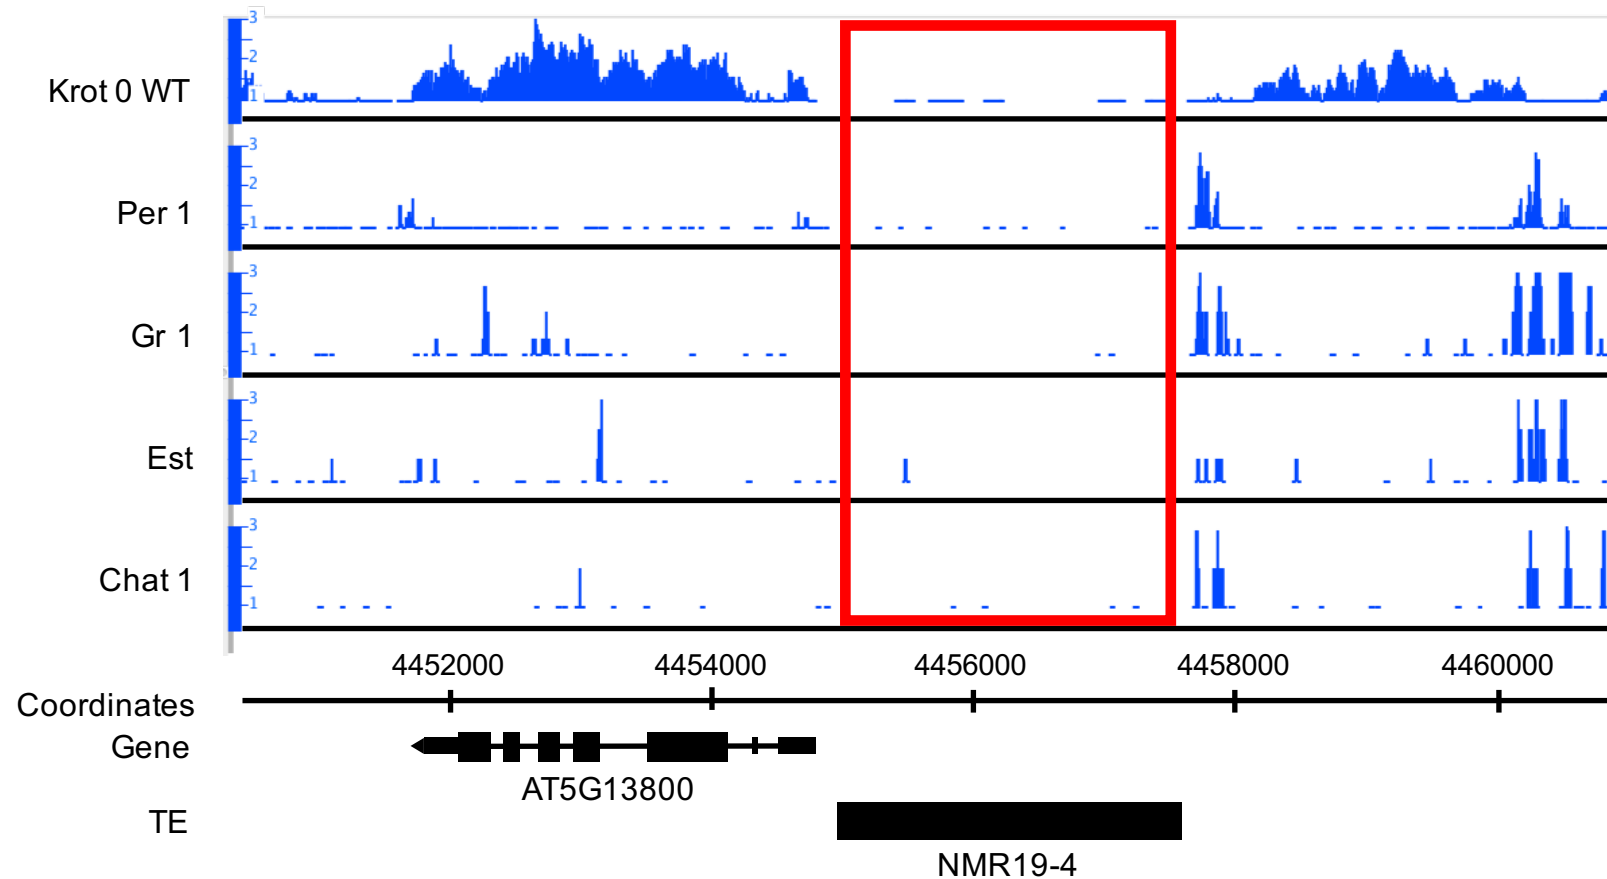

**Figure S4 ATAC-seq of Krot 0 WT, Per 1, Chat 1, Gr 1 and Est. NMR19-4 of Krot 0 WT and Per 1 were hypermethylation. NMR19-4 of Chat 1, Gr 1 and Est were hypomethylation. Red rectangle represents NMR19-4.**
